# Supplementary material
Source: Research Square preprint supplement (doi:10.21203/rs.3.rs-10210656/v1)
Supplement: Supplementary file 1 [file 3e214667435dc24ae60c6bc2.docx]

**SUPPLYMENTARY TABLE 1 Statistical Analysis of Total Ocular Wavefront Aberrations (6-mm Zone) Measured by Sightmap.**

|  | 6.5- | 6.5+ | *β* | SE | 95% CI | *P* value |
| --- | --- | --- | --- | --- | --- | --- |
| Mean ± SD (Min to Max) | Mean ± SD (Min to Max) |
| Pre-HOAs | 0.33 ± 0.09 (0.18 to 0.62) | 0.34 ± 0.15 (-0.25 to 0.91) | 0.013 | 0.025 | -0.036 to 0.062 | 0.547 |
| Pre-Spherical Aberration | 0.10 ± 0.12 (-0.11 to 0.37) | 0.08 ± 0.16 (-0.24 to 0.52) | -0.022 | 0.034 | -0.089 to 0.044 | 0.512 |
| Pre-Coma | 0.19 ± 0.11 (0.03 to 0.58) | 0.19 ± 0.13 (-0.17 to 0.85) | 0.006 | 0.024 | -0.042 to 0.053 | 0.813 |
| Pre-Vertical Coma | -0.05 ± 0.17 (-0.51 to 0.29) | -0.05 ± 0.19 (-0.82 to 0.40) | 0.004 | 0.040 | -0.074 to 0.082 | 0.926 |
| Pre-Horizontal Coma | 0.01 ± 0.12 (-0.26 to 0.28) | -0.01 ± 0.12 (-0.33 to 0.32) | -0.022 | 0.016 | -0.054 to 0.009 | 0.166 |
| Pre-Vertical Trefoil | -0.01 ± 0.06 (-0.31 to 0.14) | -0.01 ± 0.05 (-0.13 to 0.09) | 0.001 | 0.008 | -0.015 to 0.016 | 0.943 |
| Pre-Horizonta Trefoil | -0.01 ± 0.07 (-0.16 to 0.20) | -0.03 ± 0.08 (-0.17 to 0.16) | -0.015 | 0.014 | -0.043 to 0.014 | 0.306 |
| Post-HOAs | 0.47 ± 0.15 (0.18 to 0.90) | 0.38 ± 0.14 (0.11 to 0.80) | -0.085 | 0.030 | -0.144 to -0.026 | 0.005 |
| Post-Spherical Aberration | 0.06 ± 0.16 (-0.61 to 0.40) | -0.02 ± 0.11 (-0.37 to 0.18) | -0.077 | 0.032 | -0.140 to -0.015 | 0.016 |
| Post-Coma | 0.38 ± 0.17 (0.07 to 0.88) | 0.30 ± 0.15 (0.05 to 0.77) | -0.079 | 0.032 | -0.141 to -0.017 | 0.013 |
| Post-Vertical Coma | -0.31 ± 0.20 (-0.85 to 0.23) | -0.21 ± 0.19 (-0.76 to 0.21) | 0.093 | 0.041 | 0.013 to 0.173 | 0.023 |
| Post-Horizontal Coma | -0.04 ± 0.18 (-0.41 to 0.44) | -0.05 ± 0.15 (-0.37 to 0.27) | -0.007 | 0.020 | -0.047 to 0.032 | 0.720 |
| Post-Vertical Trefoil | -0.01 ± 0.05 (-0.12 to 0.15) | 0.00 ± 0.06 (-0.17 to 0.11) | 0.005 | 0.007 | -0.009 to 0.020 | 0.492 |
| Post-Horizonta Trefoil | 0.00 ± 0.08 (-0.20 to 0.20) | 0.01 ± 0.11 (-0.23 to 0.63) | 0.010 | 0.019 | -0.028 to 0.047 | 0.607 |
| Magnitude Change of HOAs | 0.14 ± 0.17 (-0.22 to 0.64) | 0.04 ± 0.21 (-0.38 to 0.76) | -0.101 | 0.040 | -0.178 to -0.023 | 0.011 |
| Magnitude Change of Spherical Aberration | -0.04 ± 0.14 (-0.49 to 0.19) | -0.10 ± 0.15 (-0.54 to 0.19) | -0.061 | 0.033 | -0.126 to 0.005 | 0.070 |
| Magnitude Change of Coma | 0.19 ± 0.19 (-0.33 to 0.70) | 0.11 ± 0.20 (-0.34 to 0.63) | -0.087 | 0.041 | -0.168 to -0.006 | 0.035 |
| Magnitude Change of Vertical Coma | -0.26 ± 0.25 (-0.84 to 0.41) | -0.17 ± 0.24 (-0.89 to 0.38) | 0.092 | 0.054 | -0.014 to 0.197 | 0.089 |
| Magnitude Change of Horizontal Coma | -0.04 ± 0.19 (-0.40 to 0.44) | -0.03 ± 0.15 (-0.45 to 0.25) | 0.014 | 0.025 | -0.034 to 0.062 | 0.576 |
| Magnitude Change of Vertical Trefoil | 0.00 ± 0.07 (-0.17 to 0.22) | 0.00 ± 0.07 (-0.19 to 0.19) | 0.004 | 0.011 | -0.017 to 0.025 | 0.712 |
| Magnitude Change of Horizontal Trefoil | 0.01 ± 0.09 (-0.15 to 0.34) | 0.04 ± 0.13 (-0.29 to 0.66) | 0.025 | 0.021 | -0.017 to 0.067 | 0.235 |

HOAs = Higher Order Aberrations; SD = Standard Deviation; SE = Standard Error; CI = Confidence Interval.

**SUPPLYMENTARY TABLE 2 The Preoperative and Postoperative Analyses of Total Ocular Wavefront Aberrometry over the 6-mm Analytical Zone using Sightmap in the 6.5- Group.**

|  | Pre 6.5- | Pos 6.5- | *β* | SE | 95% CI | *P* value |
| --- | --- | --- | --- | --- | --- | --- |
| Mean ± SD (Min to Max) | Mean ± SD (Min to Max) |
| HOAs | 0.33 ± 0.09 (0.18 to 0.62) | 0.47 ± 0.15 (0.18 to 0.90) | 0.047 | 0.008 | 0.031 to 0.062 | < 0.001 |
| Spherical Aberration | 0.10 ± 0.12 (-0.11 to 0.37) | 0.06 ± 0.16 (-0.61 to 0.40) | -0.015 | 0.007 | -0.030 to -0.001 | 0.038 |
| Coma | 0.19 ± 0.11 (0.03 to 0.58) | 0.38 ± 0.17 (0.07 to 0.88) | 0.064 | 0.009 | 0.047 to 0.081 | < 0.001 |
| Vertical Coma | -0.05 ± 0.17 (-0.51 to 0.29) | -0.31 ± 0.20 (-0.85 to 0.23) | -0.085 | 0.013 | -0.110 to -0.060 | < 0.001 |
| Horizontal Coma | 0.01 ± 0.12 (-0.26 to 0.28) | -0.04 ± 0.18 (-0.41 to 0.44) | -0.016 | 0.007 | -0.029 to -0.003 | 0.017 |
| Vertical Trefoil | -0.01 ± 0.06 (-0.31 to 0.14) | -0.01 ± 0.05 (-0.12 to 0.15) | 0.000 | 0.003 | -0.006 to 0.006 | 0.956 |
| Horizonta Trefoil | -0.01 ± 0.07 (-0.16 to 0.20) | 0.00 ± 0.08 (-0.20 to 0.20) | 0.003 | 0.004 | -0.004 to 0.011 | 0.399 |

HOAs = Higher Order Aberrations; SD = Standard Deviation; SE = Standard Error; CI = Confidence Interval.

|  | Pre 6.5+ | Pos 6.5+ | *β* | SE | 95% CI | *P* value |
| --- | --- | --- | --- | --- | --- | --- |
| Mean ± SD (Min to Max) | Mean ± SD (Min to Max) |
| HOAs | 0.34 ± 0.15 (-0.25 to 0.91) | 0.38 ± 0.14 (0.11 to 0.80) | 0.014 | 0.011 | -0.008 to 0.036 | 0.227 |
| Spherical Aberration | 0.08 ± 0.16 (-0.24 to 0.52) | -0.02 ± 0.11 (-0.37 to 0.18) | -0.034 | 0.008 | -0.049 to -0.019 | < 0.001 |
| Coma | 0.19 ± 0.13 (-0.17 to 0.85) | 0.30 ± 0.15 (0.05 to 0.77) | 0.035 | 0.011 | 0.014 to 0.056 | < 0.001 |
| Vertical Coma | -0.05 ± 0.19 (-0.82 to 0.40) | -0.21 ± 0.19 (-0.76 to 0.21) | -0.056 | 0.012 | -0.079 to -0.032 | < 0.001 |
| Horizontal Coma | -0.01 ± 0.12 (-0.33 to 0.32) | -0.05 ± 0.15 (-0.37 to 0.27) | -0.012 | 0.006 | -0.023 to 0.000 | 0.054 |
| Vertical Trefoil | -0.01 ± 0.05 (-0.13 to 0.09) | 0.00 ± 0.06 (-0.17 to 0.11) | 0.001 | 0.002 | -0.002 to 0.005 | 0.454 |
| Horizonta Trefoil | -0.03 ± 0.08 (-0.17 to 0.16) | 0.01 ± 0.11 (-0.23 to 0.63) | 0.011 | 0.006 | -0.000 to 0.023 | 0.051 |

**SUPPLYMENTARY TABLE 3 The Preoperative and Postoperative Analyses of Total Ocular Wavefront Aberrometry over the 6-mm Analytical Zone using Sightmap in the 6.5+ Group.**

HOAs = Hgher order aberrations; SD = Standard Deviation; SE = Standard Error; CI = Confidence Interval.
